# Supplementary material
Source: Springer Nature journal article supplement (https://www.springermedizin.de/resource/supplementary/13054_2005_3723_MOESM1_ESM.pdf/9721144)
Supplement: MOESM1 [file 9721144]

Total PROWESS ( $n = 1690$ )

Meeting AEC without time restriction ( $n = 612$ ; 36.2% of PROWESS)

No steroids  
( $n = 384$ )

Received steroids  
( $n = 228$ )

Meeting AEC with time restriction ( $n = 97$ ; 5.7% of PROWESS)

No steroids  
( $n = 58$ )

Received steroids  
( $n = 39$ )
